# Supplementary material for: Zic Family Member 2 (ZIC2): a Potential Diagnostic and Prognostic Biomarker for Pan-Cancer
Source: Front Mol Biosci. 2021 Feb 16;8:631067. doi: 10.3389/fmolb.2021.631067 (PMC7921168; doi:10.3389/fmolb.2021.631067)
Supplement: Supplementary file 4 [file table4.xlsx]

## Sheet: Correlation Coefficient
CancerType	BTLA	CD200	TNFRSF14	NRP1	LAIR1	TNFSF4	CD244	LAG3	ICOS	CD40LG	CTLA4	CD48	CD28	CD200R1	HAVCR2	ADORA2A	CD276	KIR3DL1	CD80	PDCD1	LGALS9	CD160	TNFSF14	IDO2	ICOSLG	TMIGD2	VTCN1	IDO1	PDCD1LG2	HHLA2	TNFSF18	BTNL2	CD70	TNFSF9	TNFRSF8	CD27	TNFRSF25	VSIR	TNFRSF4	CD40	TNFRSF18	TNFSF15	TIGIT	CD274	CD86	CD44	TNFRSF9
ACC	-0.240892	-0.125345	0.00140039	0.0559871	-0.263732	0.255483	-0.172851	-0.00519119	-0.109528	-0.17729	-0.133159	-0.195631	-0.182186	-0.258485	-0.208728	0.0689705	0.256997	-0.203992	-0.0721052	-0.0954938	-0.151913	0.0382476	-0.299417	-0.156168	-0.186718	-0.159249	-0.128266	-0.0549773	-0.252292	0.0498804	-0.0981176	-0.204686	0.121001	0.112738	0.100632	-0.148567	0.157279	-0.324118	0.00851857	-0.410821	-0.151379	0.224986	-0.123591	-0.195817	-0.181133	-0.181849	0.0829991
BLCA	-0.0684378	0.00224068	-0.11455	0.100089	0.0391899	0.0882239	-0.024052	0.148045	0.0625959	-0.0977683	0.121786	-0.0131089	-0.0354518	0.0114176	0.0982374	0.0428464	0.0443533	0.0500821	0.0911851	0.0620834	-0.114693	0.0693815	0.0185676	0.043254	0.0106879	-0.0663857	0.0514352	0.115976	0.123888	-0.000269903	0.0737831	-0.00144585	0.140258	0.203963	-0.0021484	-0.0348002	0.0903804	-0.0576443	0.0254334	-0.0767993	0.173936	-0.0611118	0.0385969	0.10188	0.0731131	0.194032	0.10526
BRCA	-0.0384355	-0.128135	-0.105026	-0.101792	-0.0333354	-0.0158933	-0.0219979	0.0732412	0.000245262	-0.0379876	0.0159638	-0.0701328	-0.0469055	-0.0731445	-0.065567	0.104566	0.035533	-0.0123718	-0.00357713	0.00310786	-0.00328269	-0.0256711	-0.0218224	0.0219131	0.0168851	-0.0428476	-0.0554738	0.0273379	0.00269848	-0.011728	-0.00956967	0.0154137	0.0767388	0.0957389	-0.0371744	-0.0379785	0.00686002	-0.0966994	-0.00398717	-0.0734747	-0.0417259	-0.0658591	-0.0157933	0.00576359	-0.0707302	-0.0661806	-0.0239734
CESC	0.0431495	0.0179728	-0.104921	-0.170523	-0.0541992	-0.0483297	-0.0218096	-0.0842707	-0.00326001	0.0269291	0.0138229	-0.00257575	0.067121	-0.00260571	-0.0537414	0.0685521	-0.159225	-0.115715	0.00513304	-0.0639354	-0.0306957	0.00939293	-0.197571	-0.037621	-0.0393359	-0.117105	0.0511181	-0.0449859	-0.106331	-0.120076	-0.0295684	-0.096646	-0.0827253	-0.0499079	-0.0333365	-0.0251021	0.128991	0.00106998	-0.084821	-0.0991779	0.150967	0.015051	-0.00284341	-0.0216874	-0.00376089	0.185036	-0.00964561
CHOL	-0.196093	-0.154914	0.185042	0.209985	-0.0275542	-0.150694	-0.0371202	0.159552	-0.0759785	-0.206841	-0.095438	-0.0685154	-0.211227	-0.0243888	0.219255	-0.275891	0.218374	0.0193212	-0.0820869	0.108026	0.214252	-0.202175	0.214576	-0.300641	0.0159722	-0.162099	0.00423713	0.0192635	-0.0809223	0.19109	-0.00927136	-0.279627	-0.0513569	0.0455322	-0.222561	-0.0733687	-0.138905	-0.0921	0.0242358	0.20102	-0.0411976	-0.0926076	-0.0585287	-0.106968	0.0172538	0.0501462	-0.110533
COAD	0.107464	0.142326	0.124979	0.126515	0.159737	0.0402633	0.246803	0.339022	0.158872	0.0321997	0.185708	0.115592	0.115034	0.0141389	0.229921	0.0411591	0.0670514	0.134085	0.175918	0.249304	0.0912821	0.0873188	0.117843	0.117732	0.0963075	0.0404998	0.0940579	0.239343	0.152434	-0.0299528	-0.109459	-0.0210557	0.0839578	0.331668	0.0805451	0.096339	-0.0668716	0.129194	0.05426	0.023409	0.22818	0.0352425	0.233188	0.278301	0.198512	0.225924	0.191584
DLBC	-0.0934423	-0.314139	-0.428044	-0.185303	-0.21992	-0.0615722	-0.265967	-0.244935	-0.119757	-0.0455504	-0.166634	0.104244	-0.236074	-0.257564	-0.289115	0.0816456	-0.150428	0.0528803	-0.167463	-0.229005	-0.0333137	-0.164701	-0.186728	-0.155933	-0.0415863	0.268428	0.0813798	-0.272278	-0.384153	-0.0695505	0.181421	0.324581	0.148193	-0.213326	-0.151387	0.174719	-0.171822	-0.280083	-0.144986	-0.0150143	-0.136635	-0.177926	-0.168735	-0.388736	-0.0493603	-0.365475	-0.417296
ESCA	-0.179773	-0.0143026	-0.324131	-0.120168	-0.215259	-0.15487	-0.178261	-0.156286	-0.237895	-0.31641	-0.241536	-0.25627	-0.192745	-0.118112	-0.175038	-0.147438	0.10241	-0.203971	-0.170596	-0.295991	-0.116049	-0.157871	-0.256223	-0.0465188	0.0444102	-0.0831503	0.0306249	-0.204615	-0.117111	-0.0749883	0.110866	-0.125066	-0.0591772	0.143341	-0.19336	-0.220391	-0.0849366	-0.0606053	-0.226924	-0.224986	0.190703	-0.165487	-0.211185	0.0491107	-0.0763743	0.256009	-0.042609
GBM	0.0149054	-0.155925	0.247368	0.0187454	-0.0218684	-0.0331017	-0.0843179	-0.165634	-0.0353341	0.0564079	-0.134116	-0.0255365	-0.213456	-0.123046	-0.040362	-0.0751394	0.0484545	0.0602887	-0.0567549	-0.174576	0.0388142	0.0959674	0.0753222	-0.0587381	-0.0542141	-0.233732	-0.331696	0.0330663	0.225977	0.0612596	-0.0576948	-0.0663178	-0.130754	-0.238909	-0.2354	-0.124347	0.00158222	0.00268022	-0.0437914	-0.0173637	0.0280587	-0.12884	-0.0356228	0.196094	-0.0163195	0.167596	-0.159862
HNSC	0.110865	0.227106	0.128851	-0.197882	-0.0188054	0.0295298	-0.0304278	0.0561118	-0.028685	0.103893	0.0548895	0.0484512	0.0436779	0.0886778	-0.0124278	0.214253	-0.211238	0.0156356	-0.0763353	0.101701	0.211626	0.0769964	-0.0909156	0.163039	0.236119	0.0627011	0.176175	0.0342477	-0.26121	0.100846	0.184453	0.121799	0.0291263	-0.0902002	0.000405171	0.138317	0.124637	-0.0355806	0.106441	0.118997	0.26618	0.265672	0.0868556	-0.0691875	-0.0870179	-0.288017	0.0807156
KICH	0.0826455	-0.159308	0.156411	0.492834	0.446097	0.0885073	0.0317926	0.515552	0.216217	0.119135	0.357816	0.23457	0.531657	0.46502	0.228112	-0.0251525	0.378941	-0.074118	0.0467561	0.374484	0.304917	-0.087733	0.341564	0.0421077	0.130723	-0.0614409	-0.0163103	-0.12273	0.684098	-0.0599432	-0.0233173	-0.0276968	0.957969	0.942036	0.369896	0.438161	0.569774	0.330241	0.133217	0.112394	0.371952	-0.0135834	0.237159	0.0926055	0.305635	0.34794	0.449673
KIRC	0.0252803	-0.298427	-0.154263	-0.196791	0.0328911	0.120856	-0.0695973	0.118918	0.00527157	-0.0738997	0.0879204	-0.0908451	0.0102899	-0.0579915	-0.133426	-0.12113	0.148587	-0.109248	0.0688306	0.101421	-0.00757497	-0.0125666	0.0969941	0.0147137	0.0466084	0.14893	0.0448455	-0.198849	0.030008	-0.296735	-0.0487125	-0.0431231	0.0182458	0.0480393	0.211796	0.0389302	-0.00146422	-0.232665	-0.0979849	-0.0334894	0.16368	-0.0793203	0.0854111	-0.0366456	-0.00138903	0.327619	0.114168
KIRP	0.214766	-0.246643	-0.345534	-0.028259	-0.122062	0.063175	-0.0827776	0.215377	0.0966031	0.038924	0.146226	-0.0327285	-0.0423607	0.031037	-0.257771	-0.081129	0.200064	0.221983	0.13489	0.18235	-0.064926	-0.0129284	0.0791048	0.0677281	0.0600781	0.0761341	-0.070534	0.23946	0.19071	-0.350272	-0.00457675	-0.0593399	-0.0382596	0.183295	0.112538	0.170807	0.114682	-0.17152	0.279072	-0.168974	0.160655	0.0928826	0.219501	0.0830488	-0.139284	0.351459	0.140974
LAML	-0.0770077	-0.00146265	-0.131465	0.00114517	-0.0531422	0.140757	0.0161513	0.137483	0.0262696	-0.0269027	0.060155	-0.112091	0.0485673	-0.0321427	-0.0990617	0.0139209	-0.0689475	-0.0133575	-0.0706432	-0.0520952	-0.0957239	0.0879426	-0.0405437	-0.0233882	-0.0327925	-0.0207432	0.61051	-0.0353795	0.0593129	-0.0270135	0.0746534	-0.066891	0.219935	0.0964905	0.0160118	-0.0355458	0.0457148	-0.141504	-0.0657248	-0.157482	0.0109109	-0.0541577	0.0954965	-0.0194663	-0.0320242	-0.0186395	0.131529
LGG	0.189145	-0.0484401	0.431963	0.0814164	0.111328	0.330064	0.080956	-0.0225991	0.130946	0.186105	0.11076	0.122661	0.0833622	0.0988316	0.0411489	-0.0699351	0.094682	0.0981317	0.0670843	0.0465984	0.0956004	0.299336	0.167535	-0.0793705	0.0255262	-0.172995	-0.200034	0.0564635	0.299126	0.111733	-0.108132	0.247442	0.1392	0.052625	-0.100187	-0.0375169	0.216984	0.0499424	0.219139	0.305404	0.164653	0.0621142	-0.0118452	0.253234	0.0481064	0.183815	0.169526
LIHC	0.0492089	0.0781237	0.228715	0.100459	0.0685214	0.224801	-0.0336826	0.0769361	0.0897042	0.0551822	0.133846	0.0434984	0.0457013	0.0626907	0.0808384	0.108216	0.383347	-0.0579046	0.0385699	0.196584	0.21262	0.00902106	0.0354091	-0.0923352	-0.0294079	-0.0444476	0.204519	0.00545404	-0.0827875	0.116047	0.00410664	0.104768	0.0383484	0.0583266	0.0622952	0.0763328	0.0918658	-0.0432515	0.168613	0.0653766	0.168372	0.347996	0.0771557	0.00982599	0.0590535	-0.0108471	0.0158738
LUAD	-0.046686	-0.0589357	-0.0168594	0.0174148	0.00743424	0.0414222	-0.066139	0.108209	0.00759298	-0.114757	-0.00358028	-0.0685008	-0.072196	-0.0655911	0.0195514	0.0964335	0.151273	-0.0328084	0.0119721	0.0904026	0.0626409	-0.0414727	-0.088687	-0.0790049	-0.00798923	-0.0516683	0.0910398	0.0409269	0.0332971	0.0539398	-0.0368345	0.0052811	0.128906	0.122661	0.0753673	-0.0676486	0.042275	-0.0107802	-0.00333684	0.070727	0.150535	-0.110992	0.0448732	0.129289	0.016607	0.0960746	0.102922
LUSC	-0.17579	0.0454357	-0.191365	-0.197598	-0.290547	-0.133897	-0.231785	-0.123761	-0.223751	-0.207346	-0.177059	-0.294574	-0.257624	-0.128492	-0.316663	-0.0670816	0.0183859	-0.122879	-0.17908	-0.226081	-0.103592	-0.0629029	-0.234188	-0.0280814	0.148721	-0.22881	0.121253	-0.230139	-0.241117	0.00895715	-0.0552169	0.0361951	-0.0506664	0.0623773	-0.0665158	-0.245444	0.0909653	-0.237289	-0.124658	-0.160838	0.12125	-0.00922054	-0.185162	-0.116908	-0.287685	0.0290448	-0.15917
MESO	-0.00538448	-0.211121	-0.270785	0.317572	-0.136736	0.110474	-0.0325082	-0.118353	0.0330637	-0.100809	-0.0521338	-0.115399	-0.0694628	-0.0297476	-0.151996	0.161689	0.336673	-0.213364	0.0792623	0.0586276	-0.110929	-0.0402451	-0.0589361	-0.0120488	-0.0766221	-0.197019	0.183441	0.0689736	-0.0383592	-0.069197	0.0566178	0.169008	0.0642678	0.0951857	-0.176399	-0.0390493	0.155697	-0.440081	0.0814032	-0.180063	-0.0899386	0.136229	-0.0337885	0.0231145	-0.0721531	-0.159067	0.0888928
OV	-0.151391	-0.211328	-0.0716705	0.0142174	-0.0428019	-0.144636	-0.0955318	0.133436	-0.0408551	-0.0643639	0.00126874	-0.0915436	0.0115616	0.0728573	-0.0570012	0.0909325	-0.0297596	-0.0231547	-0.00739492	0.0675081	0.0021639	0.0305399	-0.0498922	0.101803	0.0508589	-0.104219	-0.145094	0.0192025	-0.0605939	0.0423782	-0.0521681	0.0186464	-0.00626242	0.0199115	0.0662589	-0.00424756	0.127076	-0.133995	0.0249442	-0.0610343	0.153923	-0.0729053	-0.0657291	0.056904	-0.0540687	0.00506263	-0.0871627
PAAD	-0.147495	-0.284183	0.149758	-0.208574	-0.157816	-0.033942	-0.251652	-0.0373418	-0.117073	-0.192855	-0.0383638	-0.174366	-0.186249	-0.233848	-0.129469	-0.175573	0.130876	-0.0899536	-0.108596	-0.0290612	0.161863	-0.227595	0.0312104	-0.178215	-0.0437111	-0.175768	-0.0494746	-0.0414647	-0.166453	-0.133244	-0.161906	-0.0279428	0.224506	0.25746	-0.171955	-0.0762636	0.156964	0.0113849	0.0341472	-0.0272772	0.212837	0.126492	-0.119062	-0.157961	-0.180594	0.0468248	-0.0783437
PCPG	-0.0350218	-0.0120151	-0.0426517	0.0792672	-0.0536273	0.022978	-0.043422	-0.0569858	-0.0410516	-0.0342415	-0.137188	-0.0657235	-0.0408634	-0.0719426	-0.06618	0.031868	-0.0471443	0.123954	-0.0803004	-0.136575	-0.0239977	-0.0113757	-0.00936664	-0.0437808	-0.0784322	-0.0962514	0.0388599	-0.117854	0.0144597	-0.111846	-0.100304	0.0678514	-0.0433717	-0.0899899	-0.0259575	-0.0656715	-0.0579081	0.0771365	-0.0341802	0.0667533	-0.0507195	0.00551553	-0.054652	0.00874022	-0.118425	0.0875399	-0.122261
PRAD	-0.0202915	-0.119118	-0.0689295	0.0975842	0.0245857	0.10381	-0.0448742	-0.0477667	-0.0326299	-0.0545474	-0.0163533	-0.0288775	0.00522001	0.0249203	0.113727	-0.0208791	0.0525767	0.00582471	0.0297724	-0.0275879	-0.0178079	-0.0622593	-0.0400126	0.0656535	-0.0232093	-0.0840071	-0.117355	0.052469	-0.0271069	0.134083	0.118919	-0.0395683	0.015174	0.0896568	0.0945208	-0.0602794	-0.0533738	-0.154872	-0.00623315	-0.153405	0.0473942	-0.0604249	0.00846946	0.0201369	0.0368362	-0.0190295	0.0292013
READ	0.014967	0.12194	0.0898505	-0.0303271	0.0759726	0.00986126	0.0432678	0.0741468	0.0334307	-0.112025	0.0325716	-0.0321804	-0.00816286	-0.0342518	0.0963458	-0.0371544	-0.0392668	-0.0244735	0.0836739	0.0316861	0.125747	0.00673763	-0.0266071	0.0145866	0.110046	-0.0575238	-0.061688	0.0615602	0.0222874	-0.132507	-0.0484642	0.0363915	0.00233566	0.0840832	0.0772442	-0.0407194	0.110314	0.0411392	0.0694773	-0.108759	0.128199	0.0739341	0.0235447	0.0810383	0.0824156	0.0690293	-0.0318569
SARC	-0.142986	-0.169927	-0.206536	-0.0450911	-0.284938	-0.224599	-0.134541	-0.0187246	-0.145831	-0.191249	-0.0970876	-0.216887	-0.267962	-0.290893	-0.274696	0.00795379	-0.0714002	-0.134715	-0.161609	0.0434045	-0.304266	-0.127262	-0.168012	-0.110249	-0.0172184	-0.164976	-0.00132283	-0.231475	-0.28883	-0.0544643	-0.147306	0.508632	-0.105384	-0.0559768	-0.215729	-0.159516	0.164611	-0.3606	0.0504354	-0.182091	0.157369	-0.0548576	-0.156952	-0.099152	-0.313061	-0.338836	-0.130589
SKCM	-0.0220201	-0.137431	-0.198878	0.110514	-0.109747	-0.146236	-0.150547	-0.13151	-0.109887	-0.0674448	0.028457	-0.0999048	-0.0516879	-0.0577623	-0.120224	0.0319768	0.0509404	-0.0753615	-0.102826	-0.158625	-0.171993	-0.0144469	-0.089465	-0.0485595	0.0668051	-0.0359701	0.0732669	-0.124145	-0.123365	0.0419582	0.034441	0.0289766	-0.0383407	-0.0090131	0.0178282	-0.158216	0.00150006	-0.106476	-0.0773972	-0.067518	-0.100701	-0.076823	-0.148315	-0.128136	-0.121431	-0.167465	-0.103081
STAD	-0.0790798	-0.0702846	0.0169229	-0.093424	-0.0446114	0.0283303	-0.0289759	0.0157466	-0.0524752	-0.17042	0.00763172	-0.0850851	-0.0954664	-0.099665	0.0349944	-0.133537	0.049288	-0.00916744	-0.0109272	0.0009952	0.037814	-0.0256022	-0.146029	-0.0374338	0.00195571	-0.0133754	-0.256801	0.0892142	-0.00691509	-0.00903648	-0.134304	-0.0418676	0.0255026	0.332554	-0.102776	-0.0842345	0.0281232	-0.133937	-0.117162	-0.271974	0.137255	-0.14608	-0.0329939	0.125735	-0.021252	-0.027179	-0.0119739
TGCT	-0.214404	0.385408	-0.271766	0.336873	-0.197143	0.523021	-0.257006	-0.322008	-0.365691	-0.392079	-0.447348	-0.439768	-0.388147	-0.310577	-0.217259	0.307984	0.46031	-0.0978059	-0.229533	-0.436114	-0.282381	-0.318823	-0.253601	-0.190506	0.0111567	-0.153216	0.247095	-0.295176	-0.312679	0.179751	0.26789	0.26395	-0.0276102	0.0739112	0.166718	-0.423801	-0.519721	-0.160841	-0.143114	-0.282008	-0.313319	0.11027	-0.414637	-0.325465	-0.293067	-0.16966	-0.289856
THCA	0.116039	-0.0019377	0.140825	0.0869573	0.140309	0.111838	0.130957	0.0809484	0.14674	0.114389	0.139567	0.125518	0.145743	0.150699	0.122448	0.130152	0.0492903	0.0494829	0.167149	0.0544776	0.19657	0.134844	0.169248	0.254525	0.0614294	0.0994886	0.138882	0.108014	0.118442	-0.0334611	0.0938723	-0.00561754	0.142501	0.142561	0.0567937	0.0149759	0.144757	0.127435	0.0825657	-0.0056326	0.0458849	0.0995973	0.112531	0.0739921	0.140744	-0.0619225	0.146157
THYM	0.0845986	-0.0879486	-0.00793694	-0.181407	-0.337826	0.215067	-0.24948	0.586468	-0.101036	-0.145746	0.408879	-0.104721	-0.156684	0.121514	0.327024	-0.134607	0.15859	-0.0101107	0.474634	-0.0866157	0.413914	-0.0543824	0.0400822	0.216983	0.667924	-0.395001	0.223495	0.38383	0.0477195	-0.022625	0.49408	-0.0647941	0.711756	0.58509	0.55904	0.136147	0.220419	0.347208	0.62649	0.196737	0.515554	0.595506	0.446467	-0.162574	0.371146	0.267233	0.498721
UCEC	0.0178234	-0.192382	-0.117691	-0.0124257	0.0055813	0.00242378	0.0236135	0.108943	0.0545351	-0.0405506	0.0196913	-0.00112039	-0.00934368	-0.0452244	0.0130731	0.0648905	0.0324293	0.039294	0.0372213	0.0537267	-0.098295	-0.0505679	-0.146991	0.0293144	-0.0363836	0.0406618	-0.0488712	0.060448	0.0444245	-0.054875	0.00718014	-0.0506023	-0.0137268	0.0445614	0.0202644	0.0321818	0.0455188	-0.00538599	-0.0409323	0.0411822	-0.00315098	-0.184438	0.0485932	0.0477696	-0.00563664	0.0694602	-0.0366256
UCS	0.271765	0.130408	0.21563	0.0522623	0.134904	-0.195035	0.0507961	0.232034	0.166217	0.221381	0.0931754	0.0504314	-0.00474803	0.0822351	0.213831	-0.216943	0.0112567	0.0356191	0.0672064	0.0673118	0.285331	0.173742	0.445179	0.265793	0.206285	-0.207374	0.272553	0.261502	0.171327	-0.145399	-0.127908	-0.125142	0.164393	0.0130727	-0.0756288	0.148803	0.0990653	-0.037995	0.110053	0.0110325	0.501151	-0.0418967	0.166195	0.257791	0.1818	0.301722	0.275368
UVM	-0.00444075	-0.0264328	0.000559835	0.341991	0.246249	0.171939	0.00172263	0.123355	0.0375156	0.0575244	0.0541662	0.030116	0.140915	0.110466	0.23126	-0.0416793	0.163108	-0.0424643	-0.0671503	0.101255	0.196359	-0.00371947	0.0845621	-0.0144239	-0.136237	-0.069285	0.0461	0.025656	0.0557507	0	0.118503	0.580269	0.114893	0.153175	0.0647176	0.133964	0.523383	0.35786	-0.0357496	0.00981222	-0.0444324	0.0030676	0.0672049	0.0644076	0.17821	-0.105088	0.107251

## Sheet: P Value
CancerType	BTLA	CD200	TNFRSF14	NRP1	LAIR1	TNFSF4	CD244	LAG3	ICOS	CD40LG	CTLA4	CD48	CD28	CD200R1	HAVCR2	ADORA2A	CD276	KIR3DL1	CD80	PDCD1	LGALS9	CD160	TNFSF14	IDO2	ICOSLG	TMIGD2	VTCN1	IDO1	PDCD1LG2	HHLA2	TNFSF18	BTNL2	CD70	TNFSF9	TNFRSF8	CD27	TNFRSF25	VSIR	TNFRSF4	CD40	TNFRSF18	TNFSF15	TIGIT	CD274	CD86	CD44	TNFRSF9
ACC	0.0324706	0.271036	0.990227	0.624079	0.01885	0.0230601	0.127674	0.963784	0.33661	0.118033	0.242042	0.0840185	0.10806	0.0214433	0.0648876	0.545862	0.022232	0.0713514	0.527719	0.402506	0.18139	0.737885	0.00734779	0.169325	0.0994233	0.160962	0.259935	0.630357	0.0248907	0.662437	0.389642	0.0703729	0.288123	0.322555	0.37755	0.191312	0.166274	0.00356818	0.940605	0.000169423	0.182949	0.0462084	0.277853	0.0837188	0.110148	0.108725	0.467098
BLCA	0.166099	0.963878	0.0201862	0.0425575	0.428135	0.074	0.626829	0.00262292	0.205372	0.0476158	0.0134862	0.79104	0.473525	0.817491	0.0465544	0.386281	0.369781	0.311125	0.0647721	0.209115	0.02003	0.160322	0.707431	0.381773	0.82897	0.179197	0.298216	0.0186743	0.0119494	0.995647	0.13536	0.976687	0.00438696	3.09644e-05	0.965365	0.481698	0.0671809	0.243598	0.607163	0.120061	0.000396301	0.216343	0.435163	0.0389696	0.138954	7.51575e-05	0.032894
BRCA	0.201919	1.95241e-05	0.000473415	0.000706169	0.268435	0.597838	0.465283	0.0149305	0.993505	0.207229	0.596213	0.0197799	0.119329	0.0150639	0.0293734	0.000501493	0.238131	0.68135	0.905496	0.917847	0.913243	0.394139	0.468853	0.467007	0.575182	0.154819	0.0653977	0.364152	0.928637	0.697089	0.750778	0.608935	0.0107527	0.00144863	0.217128	0.207338	0.819896	0.00129591	0.894723	0.0146125	0.165919	0.0286577	0.600142	0.8483	0.0187534	0.0278873	0.42617
CESC	0.452009	0.754179	0.066814	0.00276537	0.344704	0.399533	0.703948	0.141367	0.95471	0.63891	0.809691	0.964209	0.241738	0.963793	0.348799	0.231825	0.00524279	0.0431049	0.928744	0.26486	0.592731	0.870014	0.000508448	0.512057	0.492999	0.0406417	0.372863	0.432977	0.0632127	0.0357747	0.606391	0.091479	0.148836	0.3843	0.561291	0.661836	0.0240313	0.985128	0.138778	0.0832599	0.00816414	0.79315	0.960492	0.70553	0.94776	0.00114725	0.86655
CHOL	0.251709	0.366979	0.27995	0.218994	0.873259	0.380336	0.829818	0.352629	0.659633	0.22613	0.579794	0.691329	0.216219	0.887721	0.19886	0.103374	0.200717	0.910946	0.634114	0.530581	0.209561	0.237007	0.208856	0.0748044	0.926335	0.344897	0.980433	0.91121	0.638949	0.264249	0.957201	0.0985991	0.766113	0.79202	0.192005	0.670654	0.419124	0.593179	0.88842	0.239754	0.811444	0.591135	0.734557	0.534635	0.920442	0.771479	0.521025
COAD	0.0196586	0.00195877	0.00661155	0.00596946	0.000501693	0.383292	5.75713e-08	3.93221e-14	0.000538647	0.485716	5.0147e-05	0.0120599	0.0124827	0.759566	4.55088e-07	0.372789	0.146236	0.00355213	0.000124191	4.18254e-08	0.0477121	0.0582751	0.0104788	0.0105518	0.0366698	0.380502	0.0413108	1.46308e-07	0.000903933	0.516681	0.0174839	0.648536	0.0686874	1.47832e-13	0.0807717	0.0366081	0.147324	0.00498237	0.239868	0.612328	5.58308e-07	0.44543	3.08726e-07	7.96569e-10	1.42464e-05	7.25913e-07	2.84365e-05
DLBC	0.527579	0.0296735	0.00240578	0.207333	0.133113	0.677604	0.0676747	0.0933677	0.417506	0.758521	0.257645	0.48074	0.106228	0.0771665	0.0462578	0.581175	0.307471	0.721123	0.255249	0.117429	0.822148	0.263283	0.203801	0.289897	0.778982	0.0650783	0.582411	0.061177	0.00702564	0.638549	0.217181	0.0243977	0.314796	0.145441	0.30436	0.234936	0.242909	0.0538418	0.325497	0.919324	0.354428	0.226318	0.251607	0.00632276	0.739008	0.0106375	0.00316932
ESCA	0.0220736	0.856649	2.57948e-05	0.127717	0.0059429	0.0490916	0.0232362	0.0470325	0.00230099	4.0969e-05	0.00195872	0.000995943	0.0139973	0.134412	0.0258911	0.0611657	0.194707	0.00922891	0.0299728	0.000131184	0.1414	0.0448129	0.00099814	0.556652	0.574696	0.292819	0.698857	0.00900526	0.137771	0.342931	0.16017	0.112799	0.454444	0.0688025	0.0136887	0.00483035	0.282536	0.443611	0.00368562	0.00399662	0.0150649	0.0353324	0.00698354	0.534855	0.334059	0.00100828	0.590323
GBM	0.847927	0.0435615	0.00122621	0.809419	0.778431	0.670137	0.277186	0.0318984	0.649321	0.467686	0.0830597	0.742478	0.00546699	0.112062	0.603442	0.333036	0.532812	0.43757	0.464948	0.0236185	0.617412	0.21592	0.331858	0.449468	0.4852	0.0022942	1.12224e-05	0.670469	0.0032262	0.430212	0.457575	0.393049	0.0911473	0.00181597	0.00212886	0.10829	0.98376	0.972494	0.573003	0.823227	0.718071	0.0960251	0.646649	0.0108504	0.8337	0.0298963	0.0384604
HNSC	0.0129391	2.70299e-07	0.00383021	7.93983e-06	0.674245	0.509176	0.496376	0.209457	0.521375	0.0198987	0.219567	0.278588	0.328745	0.0470534	0.781192	1.26731e-06	1.7966e-06	0.726736	0.0875343	0.0226747	1.71822e-06	0.0848178	0.0417365	0.000244059	8.65043e-08	0.160701	7.23226e-05	0.443888	2.82662e-09	0.0238451	3.20805e-05	0.00628868	0.514984	0.0433782	0.992775	0.00189466	0.0051661	0.426345	0.0170476	0.0076075	1.37291e-09	1.47912e-09	0.0517924	0.121583	0.0513546	4.80348e-11	0.0707774
KICH	0.512788	0.204951	0.213414	3.03814e-05	0.000195786	0.48324	0.801497	1.10837e-05	0.0836477	0.344542	0.00342922	0.0599986	5.18408e-06	9.51014e-05	0.0676106	0.842355	0.00185309	0.557357	0.711496	0.00211726	0.013521	0.487091	0.005359	0.739101	0.299301	0.626825	0.897393	0.330073	3.34651e-10	0.635266	0.853725	0.826644	7.12538e-36	1.39713e-31	0.00242393	0.000261784	7.28097e-07	0.00721716	0.290095	0.372715	0.00228191	0.914477	0.0571491	0.46313	0.0132918	0.0045103	0.000171363
KIRC	0.559583	1.81867e-12	0.000341995	4.51667e-06	0.447733	0.00512379	0.107841	0.00588842	0.903178	0.0877029	0.0420741	0.0356687	0.812303	0.180461	0.001983	0.00502326	0.000564886	0.0114529	0.111785	0.0189539	0.861235	0.771818	0.024863	0.734194	0.281875	0.000548269	0.300494	3.56937e-06	0.488549	2.45473e-12	0.260693	0.319459	0.6737	0.267347	7.6696e-07	0.368816	0.973046	5.2142e-08	0.0234176	0.439513	0.0001431	0.0667606	0.048319	0.3976	0.97443	7.50079e-15	0.00821288
KIRP	0.000234874	2.23069e-05	1.5843e-09	0.632353	0.0380957	0.284444	0.160459	0.000225206	0.101219	0.509838	0.0128299	0.579495	0.473169	0.599258	9.06509e-06	0.168981	0.000623917	0.000141837	0.0218084	0.0018541	0.27128	0.826775	0.179902	0.25109	0.308763	0.196861	0.231942	3.90267e-05	0.00112214	9.13086e-10	0.938251	0.314756	0.517094	0.00175368	0.0560146	0.0035848	0.0514668	0.00344562	1.43737e-06	0.00396594	0.00619851	0.115125	0.000169022	0.159088	0.0178305	7.94168e-10	0.0164776
LAML	0.34731	0.985779	0.107609	0.988866	0.51695	0.0847305	0.843958	0.0923003	0.748832	0.742989	0.46312	0.170602	0.55372	0.69521	0.22622	0.865285	0.400235	0.870689	0.388719	0.525254	0.242328	0.282931	0.621114	0.775606	0.689363	0.800419	8.60857e-17	0.66627	0.469416	0.741967	0.362293	0.414469	0.00665861	0.238559	0.845288	0.664796	0.57727	0.0830756	0.422671	0.0534637	0.894221	0.508961	0.243454	0.81247	0.696278	0.820297	0.107435
LGG	1.1888e-05	0.266078	1.85436e-25	0.0613096	0.0103935	6.54598e-15	0.0627954	0.604029	0.00254747	1.64751e-05	0.0107938	0.00472517	0.0553483	0.0230071	0.34487	0.108127	0.0294487	0.0239993	0.123311	0.284705	0.0279031	2.06112e-12	0.000108129	0.0681397	0.558003	6.34293e-05	3.53772e-06	0.194761	2.13901e-12	0.0101162	0.0128297	8.0392e-09	0.00132887	0.226913	0.0211859	0.389155	4.68008e-07	0.251517	3.57547e-07	6.97497e-13	0.000142345	0.153688	0.785773	3.48064e-09	0.269389	2.09933e-05	8.91883e-05
LIHC	0.342598	0.131532	7.90675e-06	0.0522345	0.186082	1.1377e-05	0.516083	0.137519	0.0831876	0.287142	0.00955709	0.401581	0.378143	0.226466	0.118603	0.0364444	1.53853e-14	0.263989	0.457066	0.000130011	3.3892e-05	0.861961	0.494795	0.0745028	0.570755	0.391377	6.77165e-05	0.916277	0.10995	0.024812	0.936911	0.0428771	0.459657	0.260519	0.229415	0.140639	0.0759958	0.404261	0.00106274	0.20715	0.00108073	4.35897e-12	0.136396	0.849784	0.254615	0.834388	0.759622
LUAD	0.285176	0.177135	0.699665	0.690275	0.864932	0.343051	0.12979	0.0130231	0.862077	0.00842925	0.934712	0.116613	0.098125	0.133007	0.654599	0.0269967	0.00049917	0.452735	0.784136	0.0382032	0.151389	0.342464	0.0420345	0.0702224	0.854957	0.236822	0.0368576	0.348859	0.446028	0.216812	0.399193	0.903823	0.00305901	0.00484521	0.0841908	0.121241	0.3332	0.805171	0.939143	0.105174	0.000532148	0.0108531	0.304316	0.00297199	0.703948	0.0275738	0.018219
LUSC	7.63013e-05	0.310119	1.61377e-05	8.35765e-06	3.34205e-11	0.00267268	1.54839e-07	0.00553901	4.19253e-07	2.86305e-06	6.75537e-05	1.73423e-11	4.88472e-09	0.00396661	3.9351e-13	0.133763	0.681411	0.00588773	5.55469e-05	3.15239e-07	0.0203871	0.159774	1.14124e-07	0.530593	0.000840498	2.24877e-07	0.00658225	1.90455e-07	4.64808e-08	0.841487	0.217287	0.418862	0.25765	0.163299	0.13708	2.61537e-08	0.0418293	7.66088e-08	0.00520353	0.000300814	0.0065836	0.836891	3.04281e-05	0.00881369	5.29464e-11	0.516581	0.000348035
MESO	0.960757	0.051026	0.0116784	0.00288735	0.209336	0.31125	0.766363	0.27778	0.762488	0.355724	0.633562	0.290033	0.525093	0.785706	0.162395	0.136934	0.00152671	0.0485548	0.468185	0.591823	0.309246	0.712944	0.589871	0.912326	0.483179	0.069032	0.0909038	0.528023	0.72585	0.526684	0.604609	0.119805	0.556612	0.383328	0.104229	0.721118	0.152289	2.23616e-05	0.456215	0.0971185	0.410211	0.211048	0.75744	0.832695	0.509132	0.143501	0.415698
OV	0.00313089	3.36168e-05	0.163784	0.782638	0.406035	0.00478284	0.0631812	0.00930114	0.427738	0.21123	0.98036	0.0750732	0.822489	0.1569	0.268324	0.0770468	0.563553	0.653182	0.885903	0.189723	0.966509	0.553367	0.332698	0.0476487	0.323404	0.0425857	0.00464998	0.709423	0.239266	0.410701	0.311089	0.717472	0.903283	0.699206	0.198068	0.934314	0.0132949	0.0090075	0.628327	0.235863	0.00265949	0.156626	0.201686	0.269143	0.293766	0.921747	0.0901708
PAAD	0.0494461	0.00012088	0.0460195	0.00520735	0.0353873	0.652868	0.000702761	0.620696	0.119637	0.00990489	0.61116	0.0199228	0.0128036	0.00168018	0.0849939	0.0190695	0.0816313	0.23244	0.149045	0.700182	0.030884	0.00224836	0.679192	0.017312	0.562355	0.0189345	0.511937	0.58263	0.0263762	0.0762139	0.0308386	0.711197	0.00258899	0.000521585	0.0217256	0.311639	0.0364031	0.880111	0.650907	0.717781	0.00433976	0.0924747	0.113438	0.0352169	0.0158517	0.534823	0.298586
PCPG	0.63788	0.871756	0.566449	0.286135	0.470907	0.757511	0.559454	0.443539	0.581111	0.645393	0.0640406	0.37672	0.582846	0.333141	0.373407	0.668464	0.526251	0.0945663	0.279881	0.0652508	0.747107	0.878526	0.899855	0.556211	0.291257	0.194922	0.601474	0.112079	0.845959	0.131712	0.176695	0.361432	0.559909	0.225712	0.72724	0.377099	0.436185	0.299326	0.645985	0.369273	0.495328	0.940929	0.46246	0.906521	0.110339	0.23865	0.099193
PRAD	0.651133	0.00772856	0.124113	0.0292868	0.583755	0.0203739	0.317115	0.286894	0.467065	0.223853	0.715549	0.519841	0.907403	0.578644	0.0110112	0.641728	0.241061	0.896733	0.506982	0.538661	0.691491	0.164946	0.37243	0.14306	0.604999	0.060767	0.00869005	0.242027	0.545767	0.00268891	0.00783188	0.377767	0.735265	0.0453073	0.0347836	0.178824	0.233992	0.000516829	0.889537	0.000584768	0.290674	0.177776	0.85031	0.653619	0.411604	0.671523	0.515169
READ	0.847762	0.116451	0.248197	0.697233	0.329154	0.899351	0.578755	0.340944	0.668	0.149485	0.676044	0.67972	0.916616	0.660346	0.215496	0.633577	0.614387	0.753567	0.282343	0.684374	0.105395	0.931135	0.732864	0.851586	0.156853	0.460272	0.428389	0.429348	0.774963	0.0878149	0.53397	0.640569	0.976102	0.279988	0.321099	0.601339	0.155839	0.597592	0.372297	0.161792	0.0987248	0.342334	0.762636	0.297832	0.289669	0.375395	0.682765
SARC	0.0203558	0.00573174	0.000751939	0.466526	2.64499e-06	0.000240599	0.0291519	0.762467	0.0179629	0.00183587	0.11625	0.000395865	1.05416e-05	1.59293e-06	6.15865e-06	0.897851	0.248552	0.0289419	0.00864812	0.483377	4.88822e-07	0.0391698	0.00631122	0.0742824	0.781069	0.00733762	0.982966	0.000152118	1.90141e-06	0.379017	0.0168216	1.03731e-18	0.0880739	0.365902	0.000425955	0.00956387	0.00747073	1.70181e-09	0.415332	0.00303898	0.0105916	0.37558	0.0108023	0.108654	2.17533e-07	1.73608e-08	0.0342781
SKCM	0.63359	0.00280015	1.37264e-05	0.0164213	0.0171885	0.00146066	0.0010482	0.00425065	0.0170461	0.143879	0.537847	0.0301699	0.262916	0.210825	0.00900914	0.488743	0.26989	0.102361	0.0256438	0.000549644	0.000176297	0.754496	0.052337	0.292945	0.147727	0.436085	0.112289	0.00698525	0.0073522	0.363573	0.455853	0.530446	0.406435	0.845322	0.699557	0.000568337	0.974098	0.0208204	0.093392	0.143443	0.0288726	0.0958557	0.00124605	0.00535334	0.00833657	0.000261659	0.0252778
STAD	0.12635	0.174403	0.743941	0.0707526	0.388995	0.584452	0.575915	0.76118	0.310829	0.000921638	0.882898	0.099939	0.0647838	0.0538097	0.499289	0.00962827	0.341173	0.859557	0.832963	0.984675	0.46534	0.621157	0.00460252	0.469842	0.96989	0.796284	4.62839e-07	0.0844735	0.893826	0.861543	0.00921694	0.418855	0.622516	3.91214e-11	0.0467153	0.103389	0.587204	0.00941168	0.023263	8.77821e-08	0.00777535	0.00458835	0.524147	0.0148348	0.681648	0.599821	0.817232
TGCT	0.00719478	6.75307e-07	0.000599416	1.70744e-05	0.0136339	2.48109e-12	0.00120047	4.14474e-05	2.67414e-06	4.15222e-07	4.77774e-09	9.25052e-09	5.53795e-07	7.94887e-05	0.00644257	9.18035e-05	1.48594e-09	0.224486	0.00394658	1.26476e-08	0.000354891	4.98258e-05	0.00140129	0.017212	0.890058	0.0561894	0.00187237	0.000183438	7.06554e-05	0.0247458	0.000722083	0.00087014	0.732243	0.359153	0.0375125	3.53244e-08	3.59178e-12	0.0448754	0.0747	0.000361612	6.81562e-05	0.170568	7.3911e-08	3.38606e-05	0.000204956	0.0342273	0.000242264
THCA	0.00871679	0.965182	0.00143072	0.0496843	0.00149026	0.011491	0.00304727	0.067762	0.000888194	0.00972636	0.00157984	0.00452738	0.000963763	0.000639181	0.00562431	0.00323416	0.266536	0.26467	0.000149323	0.219383	7.74994e-06	0.00227562	0.000122772	5.53699e-09	0.165999	0.0246508	0.00166688	0.0146686	0.00741395	0.450841	0.0340554	0.899295	0.00125219	0.00124628	0.20038	0.735821	0.00104424	0.00394416	0.0624336	0.899027	0.301029	0.0244935	0.0109855	0.0950846	0.00143999	0.162619	0.000931676
THYM	0.360317	0.341542	0.931729	0.048332	0.000171664	0.0188291	0.00621566	2.41538e-12	0.274247	0.113747	3.89853e-06	0.257033	0.08881	0.188022	0.000283313	0.144416	0.0849488	0.913096	4.94134e-08	0.348937	2.87955e-06	0.556925	0.665157	0.0177721	1.06537e-16	8.76313e-06	0.0145535	1.63893e-05	0.606303	0.807048	1.12753e-08	0.483868	1.15721e-19	2.79527e-12	3.90212e-11	0.139838	0.0160048	0.000109423	2.52592e-14	0.0319931	1.97403e-09	9.11093e-13	3.59312e-07	0.0773083	3.24708e-05	0.00330306	7.81577e-09
UCEC	0.677178	5.74132e-06	0.00580893	0.771644	0.896284	0.954856	0.581227	0.0107084	0.202427	0.343391	0.64555	0.979124	0.827246	0.290603	0.760102	0.129221	0.448681	0.358565	0.384497	0.209208	0.021372	0.237278	0.000556682	0.493462	0.395294	0.342068	0.253406	0.157622	0.299229	0.199624	0.866818	0.236959	0.7485	0.297741	0.635969	0.452153	0.287471	0.899894	0.338864	0.33592	0.941333	1.39236e-05	0.256119	0.264276	0.895261	0.104318	0.392156
UCS	0.04275	0.338078	0.110473	0.702064	0.321541	0.149737	0.710049	0.0852887	0.220824	0.101065	0.494593	0.71204	0.972295	0.546819	0.113549	0.108268	0.934376	0.794386	0.62262	0.622073	0.03304	0.200331	0.000586152	0.0477118	0.127176	0.125136	0.0421283	0.05156	0.206755	0.28497	0.347497	0.358107	0.226004	0.923819	0.57959	0.273723	0.46759	0.781	0.419413	0.93568	8.34975e-05	0.759156	0.220888	0.0550885	0.179925	0.023827	0.0399673
UVM	0.968815	0.815962	0.996068	0.00190335	0.0276739	0.127247	0.9879	0.275657	0.741109	0.61227	0.633218	0.790866	0.212479	0.329326	0.0390207	0.713557	0.148284	0.708402	0.553967	0.371485	0.0808661	0.973878	0.4558	0.89895	0.228206	0.541408	0.6847	0.821279	0.623296	1	0.295128	1.6871e-08	0.310187	0.174941	0.568447	0.236136	6.31634e-07	0.00111778	0.752897	0.931161	0.695536	0.978455	0.553644	0.570305	0.11375	0.353557	0.343682
